# Supplementary material for: Detailed Characterization of the Conversion of Hardwood and Softwood Lignin by a Brown-Rot Basidiomycete
Source: Atypon-hosted journal article supplement (doi:10.1021/acs.biomac.4c01403), 2025-01-06
Supplement: bm4c01403_si_001.pdf [file bm4c01403_si_001.pdf]

# Supporting information

## Detailed characterization of the conversion of hardwood and softwood lignin by a brown-rot basidiomycete

*Morten Rese<sup>1§</sup>, Gijs van Erven<sup>2,3§</sup>, Romy J. Veersma<sup>3</sup>, Gry Alfredsen<sup>4</sup>, Vincent G. H. Eijsink<sup>1</sup>, Mirjam A. Kabel<sup>3</sup> and Tina R. Tuveng<sup>1\*</sup>.*

<sup>1</sup>Faculty of Chemistry, Biotechnology, and Food Science, Norwegian University of Life Sciences (NMBU), P.O. Box 5003, 1433 Ås, Norway

<sup>2</sup>Wageningen Food and Biobased Research, Bornse Weiland 9, 6708 WG, Wageningen, The Netherlands

<sup>3</sup>Wageningen University & Research, Laboratory of Food Chemistry, Bornse Weiland 9, 6708 WG, Wageningen, The Netherlands

<sup>4</sup>Norwegian Institute of Bioeconomy Research, Division of Forestry and Forest Resources, P.O. Box 115, NO-1431, Ås, Norway.

\*Email: [tina.tuveng@nmbu.no](mailto:tina.tuveng@nmbu.no)

<sup>§</sup>These authors contributed equally to this study

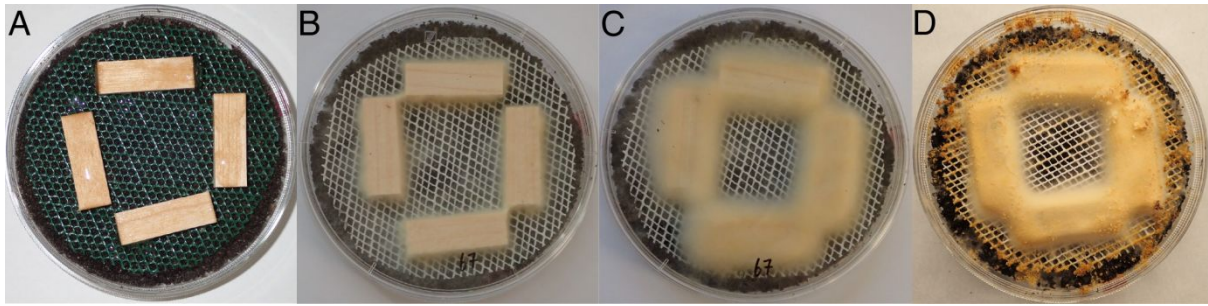

**Figure S1. Development of *G. trabeum* mycelium on spruce wood blocks.** (A) Wood blocks just after inoculation with liquid culture, and (B) 3 weeks, (C) 6 weeks, and (D) 18 weeks post-inoculation, i.e., at the time of harvest. The plates were incubated at 22 °C. The pictures are also representative for growth on birch.

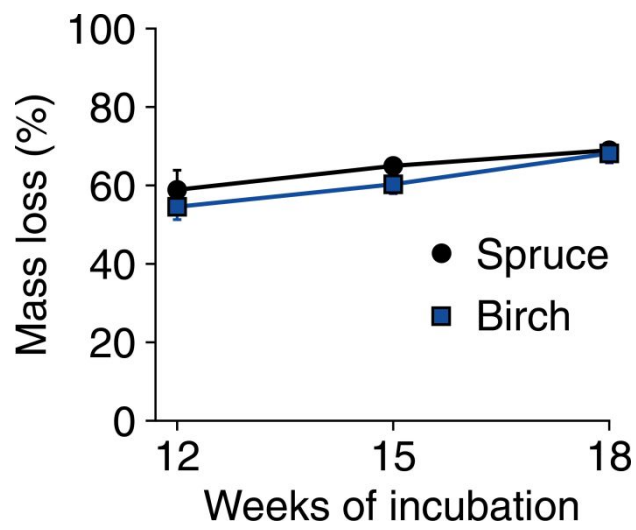

**Figure S2. Mass loss of spruce and birch wood blocks during incubation with *G. trabeum*.** Calculation of mass loss was done using four replicates with error bars representing standard deviation. Mass loss was calculated in percentage based on the change between initial and final dry weight.

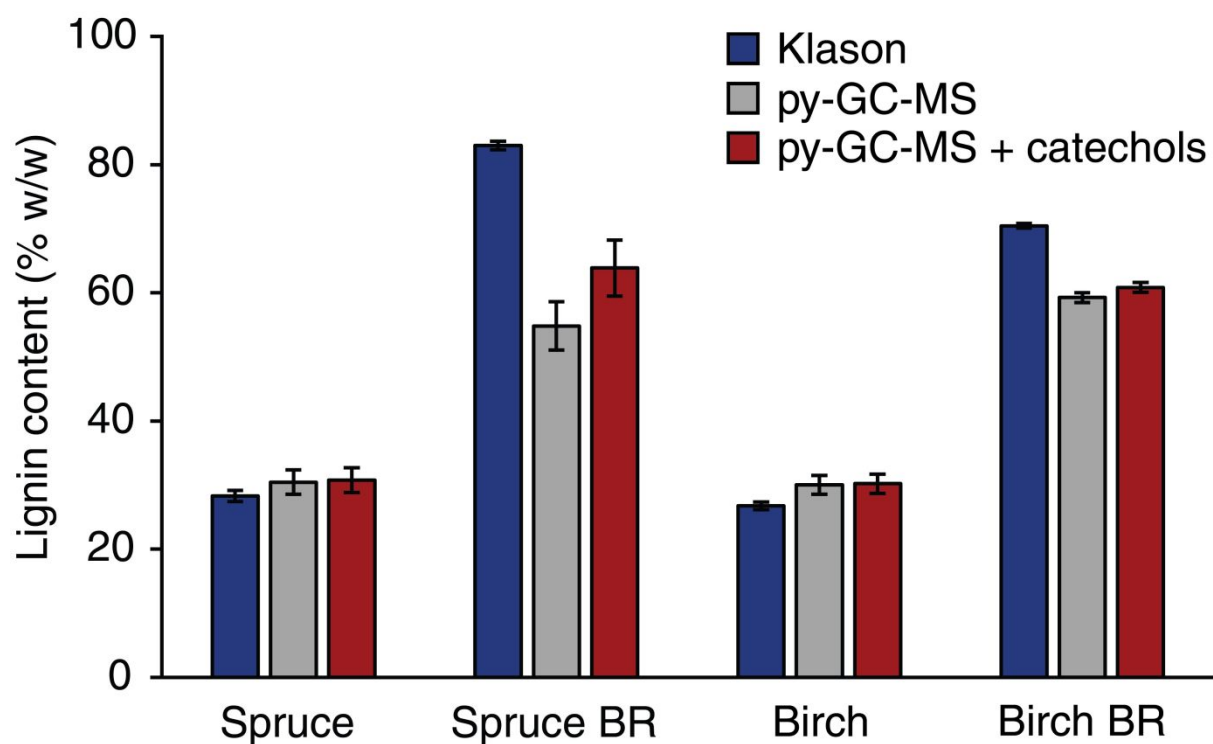

**Figure S3. Lignin content in sound and brown-rot decayed wood (18 weeks decay).** Determination of the lignin content was done by the Klason method (blue bars),  $^{13}\text{C}$ -IS pyrolysis-GC-MS without (grey bars) and with catechols included in the calculation (red bars). Error bars show standard deviation (n=3).

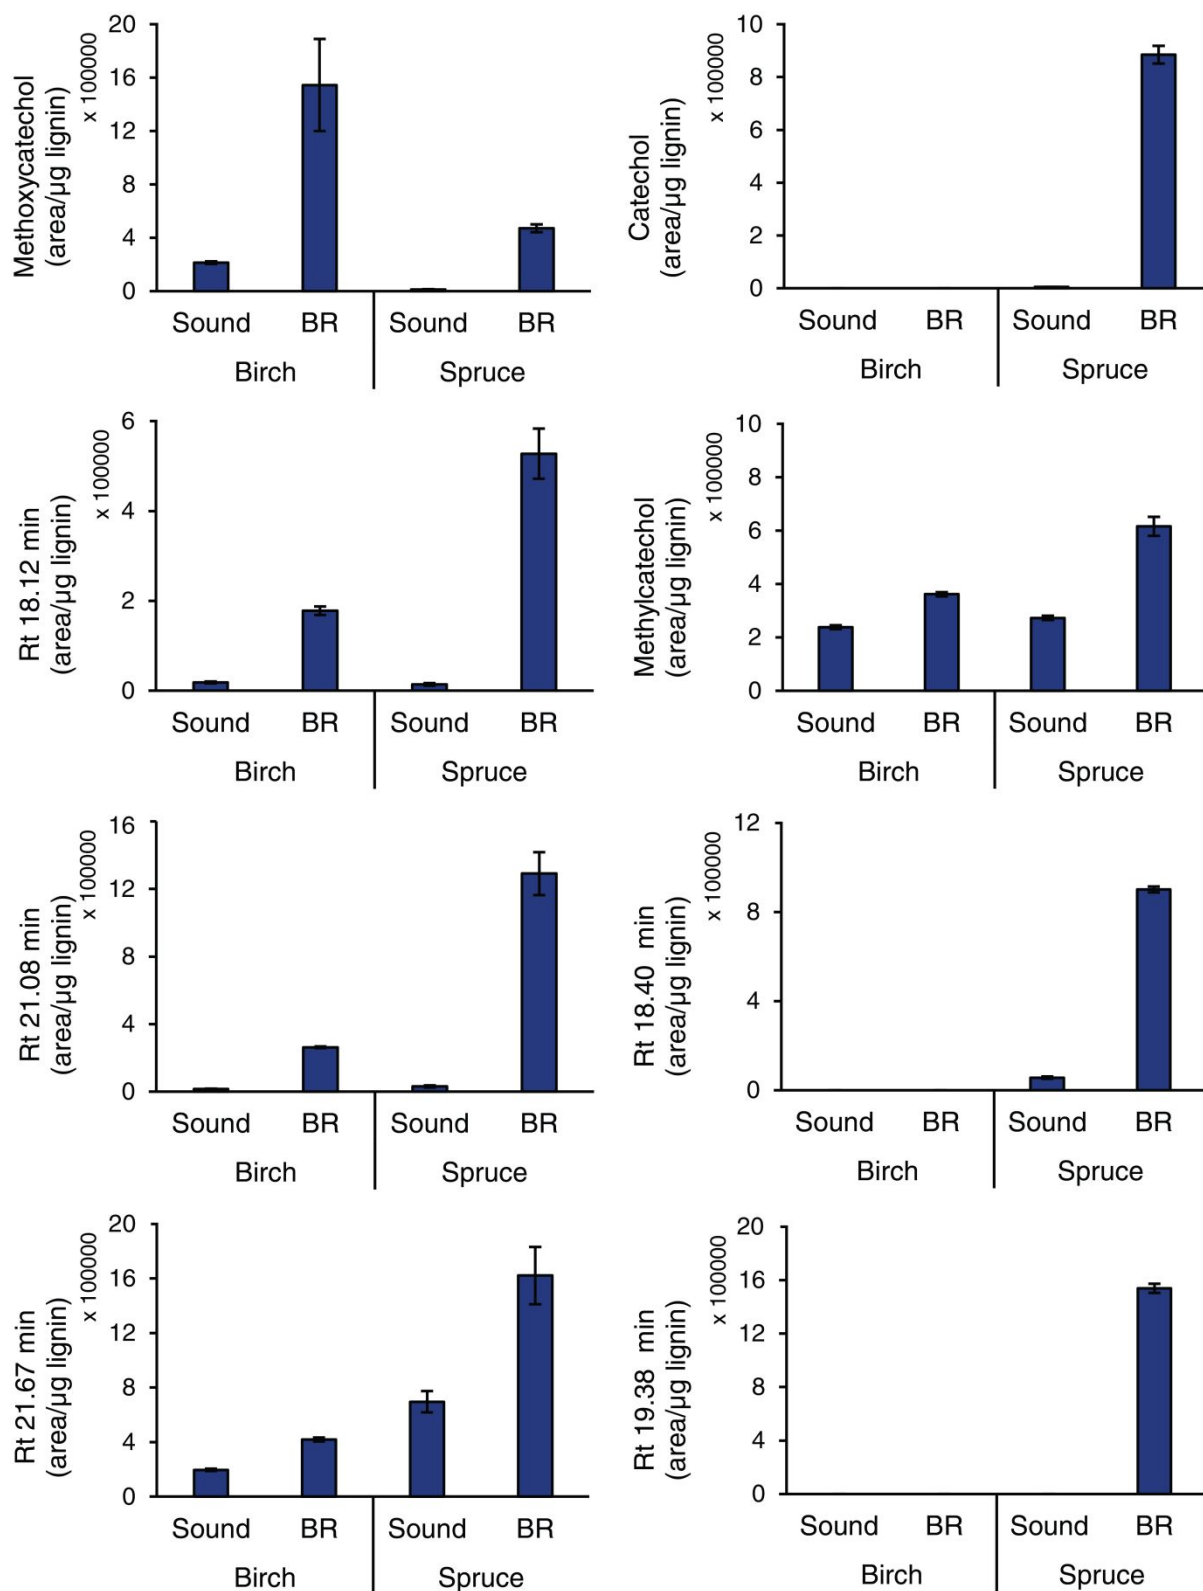

**Figure S4. Abundance of catechol and methoxycatechol pyrolysis products.** The graphs show the abundance of catechol/methoxycatechol pyrolysis products in sound and brown-rot decayed wood, as determined by  $^{13}\text{C}$ -IS pyrolysis-GC-MS. See Table S2 for (tentative) annotation. The name of the compound or the retention time (for catechol and methoxycatechol derivatives) for the peak used for calculation is given on the y-axis. Error bars show standard deviation (n=3).

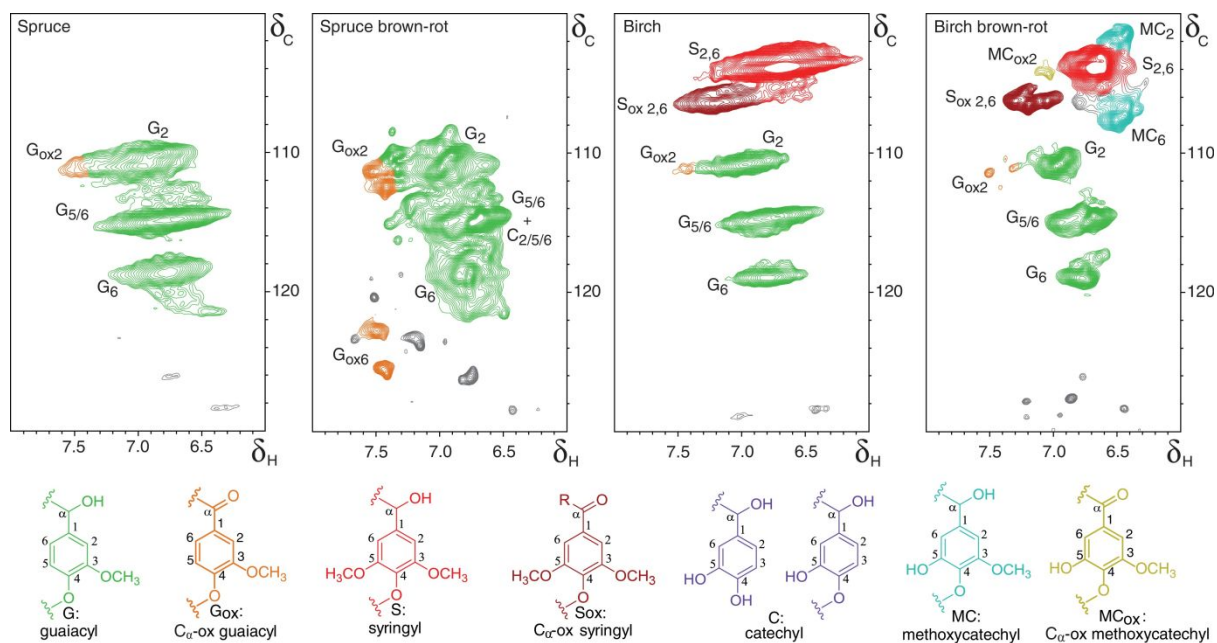

**Figure S5. Aromatic regions of HSQC NMR spectra of sound and brown-rot decayed wood.** Subscripted numbers and Greek letters in the annotated molecular structures indicate which carbon in the annotated substructure the signal originates from. Annotated substructures have colors corresponding to colored signals. The main position for further coupling is indicated with wavy lines. Unassigned peaks are shown in grey.

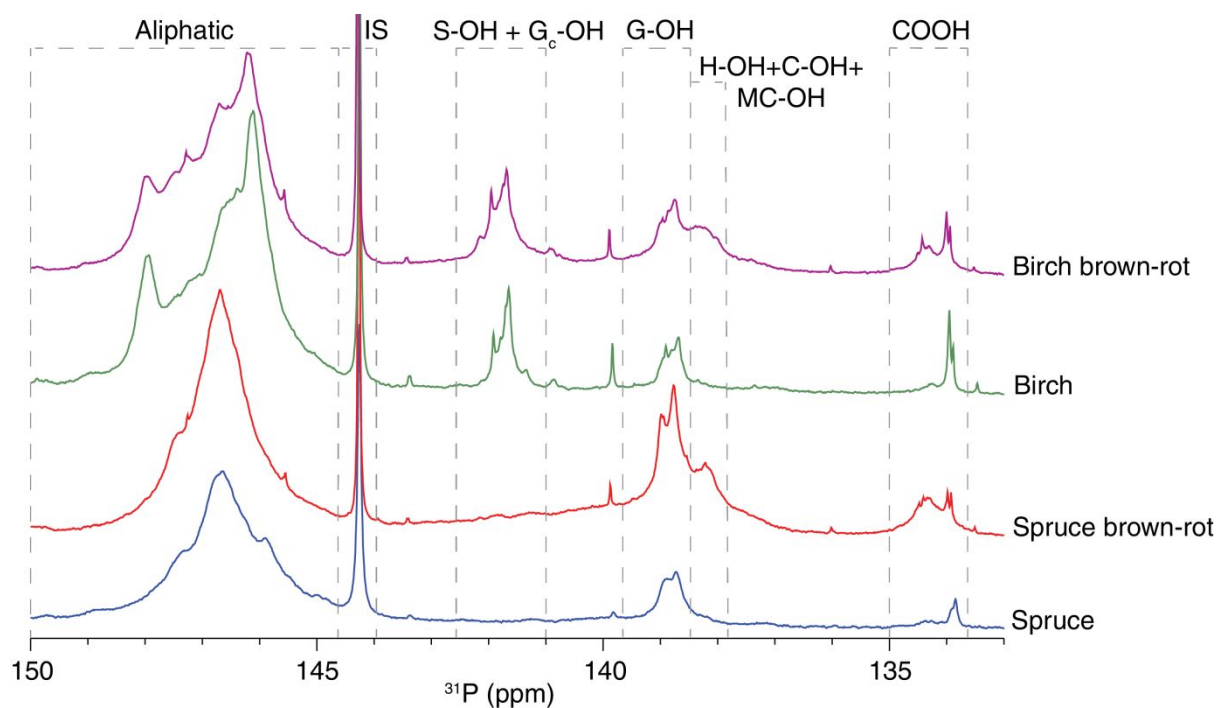

**Figure S6.**  $^{31}\text{P}$  NMR spectra after phosphitylation of lignin isolated (through enzyme treatment) from sound and brown-rot decayed wood. The peaks are annotated as aliphatic hydroxyl groups, phenolic hydroxyl groups including syringyl (S-OH) and guaiacyl (G-OH) units, carboxylic acid groups (COOH), and "H-OH + C-OH + MC-OH" represents hydroxyl groups on H-units, catechol, and methoxycatechol.

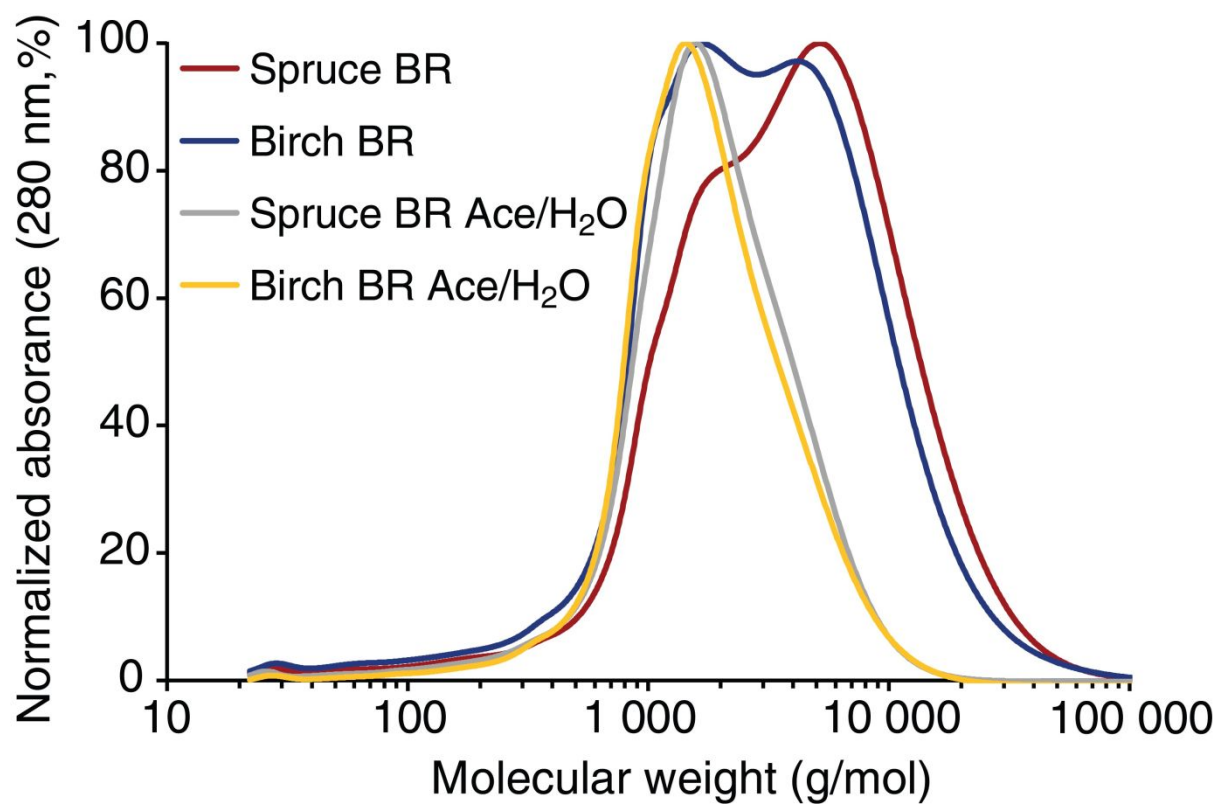

**Figure S7. Alkaline SEC elution profiles of lignin isolated from brown-rot decayed wood.** Lignin isolates of brown-rot decayed spruce and birch, and acetone/H<sub>2</sub>O extracts of these, were dissolved in 0.5 M NaOH prior to SEC analysis.



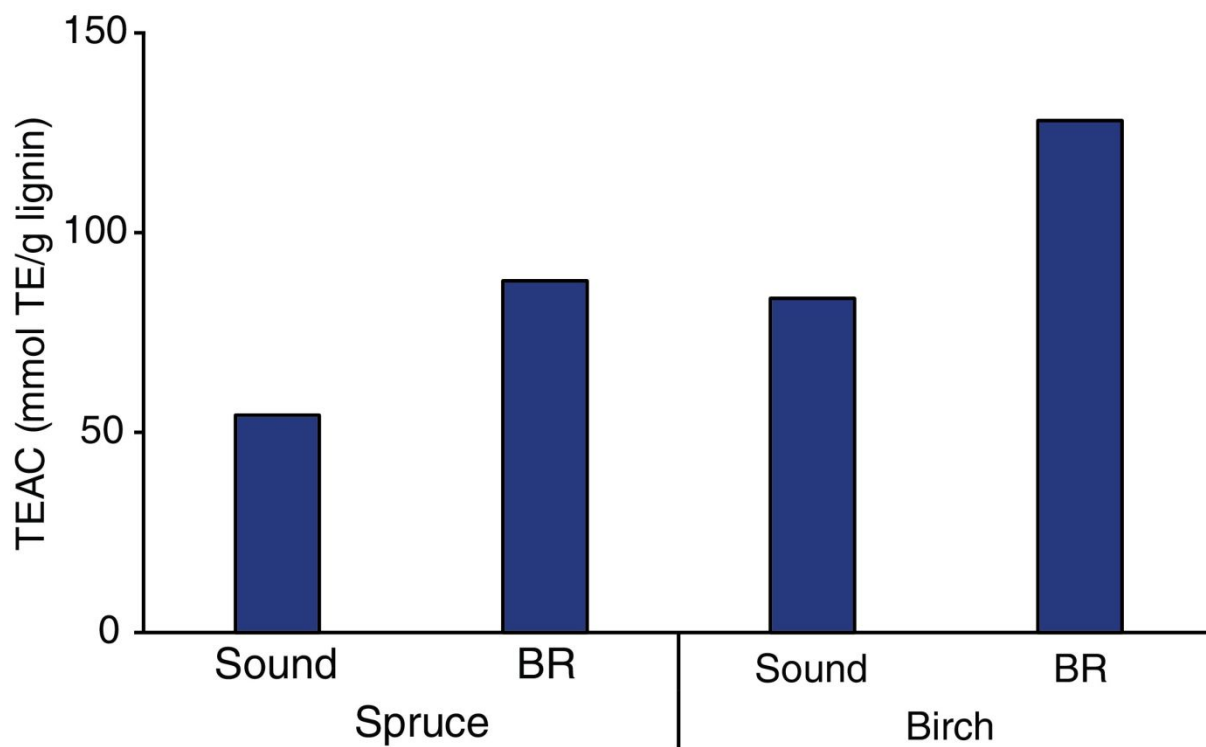

**Figure S8. Antioxidant capacity of lignin isolates.** The Trolox Equivalent Antioxidant Capacity (TEAC) method was used to determine the antioxidant capacity of lignin isolated from sound and brown-rot decayed spruce and birch. Data are single measurements. Method validation indicated an error of  $< \pm 1\%$ , and therefore the observed differences between sound and brown-rot decayed wood are assumed to be significant.

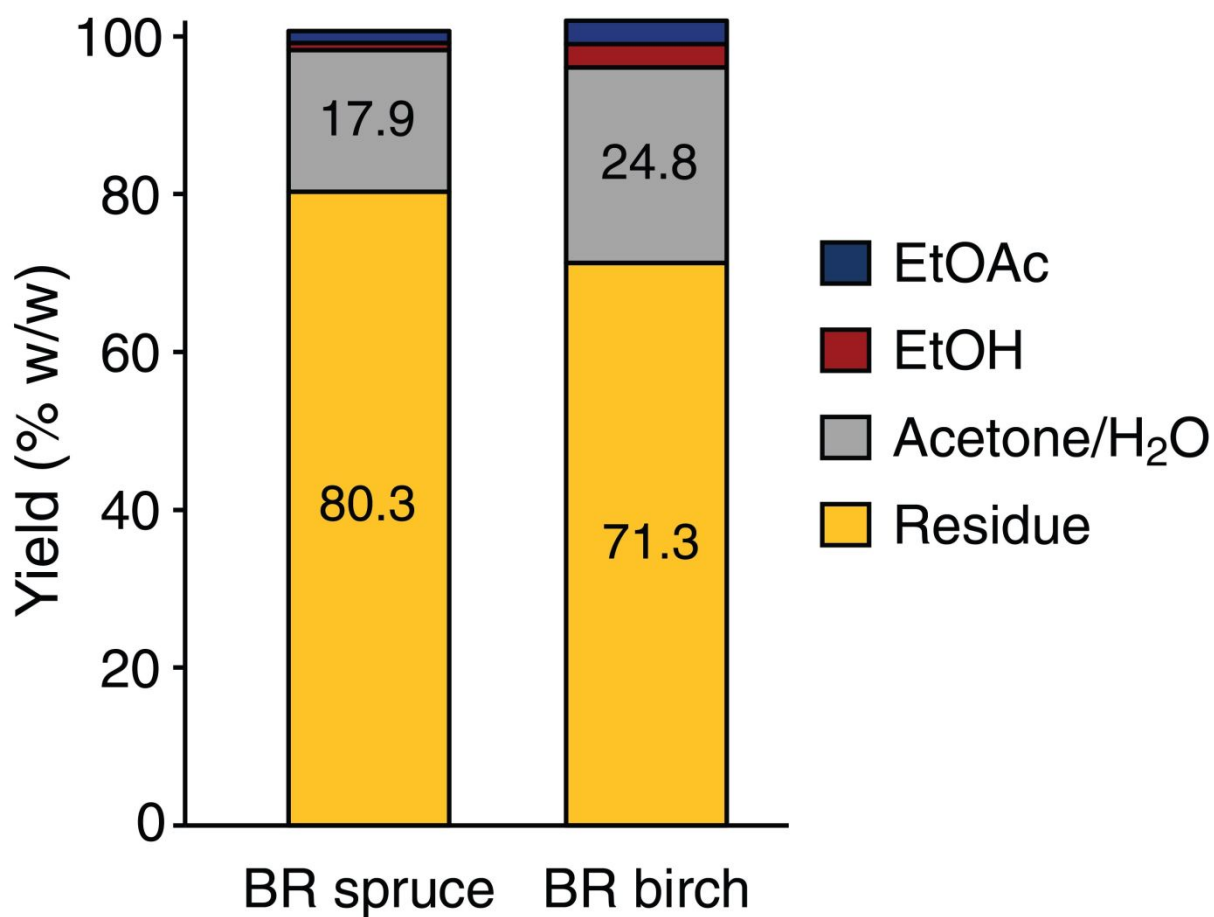

**Figure S9. Sequential solvent fractionation of brown-rot decayed spruce and birch.** Relative mass (dry weight) of fractions after sequential solvent fractionation of brown-rot decayed spruce and birch with ethyl acetate (EtOAc), ethanol (EtOH) and 80% (v/v) acetone in water (Ace/H<sub>2</sub>O).

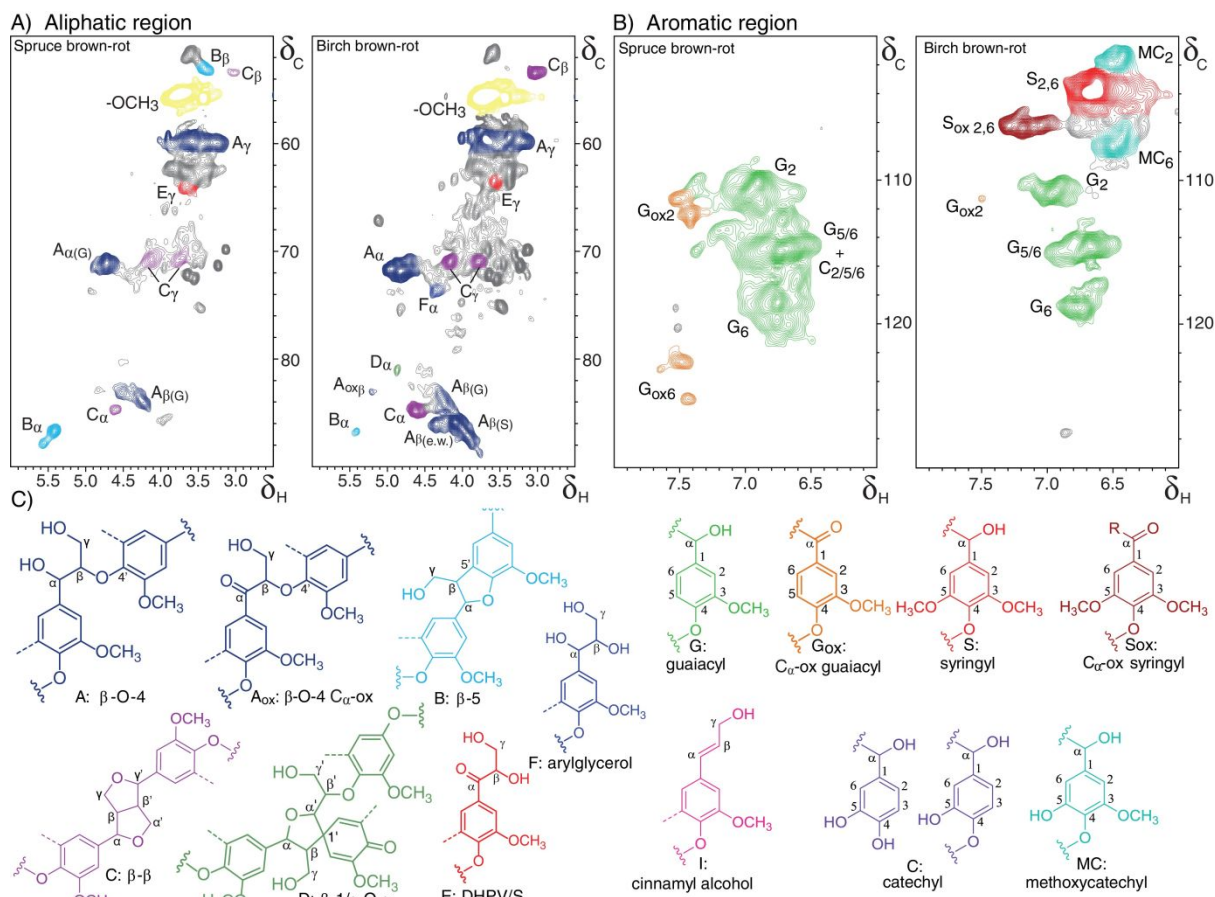

**Figure S10. HSQC NMR spectra of acetone/H<sub>2</sub>O extracts of brown-rot decayed wood.** The spectra show the aliphatic (A) and aromatic (B) regions. Annotated substructures (C) are shown with subscripted numbers and Greek letters indicating which carbon in the annotated substructure the signal originates from. Annotated substructures have colors corresponding to colored signals in A and B. Dashed lines indicate -H (guaiacyl) or -OCH<sub>3</sub> (syringyl), while the main position for further coupling is indicated with wavy lines. Unassigned peaks are shown in grey.

**Table S1.** Identity and structural classification of lignin-derived pyrolysis products detected using  $^{13}\text{C}$ -IS pyrolysis-GC-MS.

| #  | Compound                   | CAS      | Retention time (min) | Structural feature             | Sidechain length | $M_w$ $^{12}\text{C}$ (g·mol $^{-1}$ ) | Quan $^{12}\text{C}$ [M-e] | ion $M_w$ $^{13}\text{C}$ (g·mol $^{-1}$ ) | Quan ion $^{13}\text{C}$ [M-e] |
|----|----------------------------|----------|----------------------|--------------------------------|------------------|----------------------------------------|----------------------------|--------------------------------------------|--------------------------------|
| 1  | phenol                     | 108952   | 9.61                 | H, unsub.                      | 0                | 94                                     | 94.04132                   | 100                                        | 100.06145                      |
| 2  | guaiacol                   | 90051    | 9.91                 | G, unsub.                      | 0                | 124                                    | 124.05188                  | 131                                        | 115.04853                      |
| 3  | 2-methylphenol             | 95487    | 10.87                | H, methyl                      | $C_\alpha$       | 108                                    | 108.05698                  | 115                                        | 115.08045                      |
| 4  | 4-methylphenol (+3-MP)     | 106445   | 11.83                | H, methyl                      | $C_\alpha$       | 108                                    | 107.04914                  | 115                                        | 114.07263                      |
| 5  | 4-methylguaiacol           | 93516    | 12.58                | G, methyl                      | $C_\alpha$       | 138                                    | 138.06753                  | 146                                        | 146.09437                      |
| 6  | 2,4-dimethylphenol         | 105679   | 13.06                | H, methyl                      | $C_\alpha$       | 122                                    | 107.04914                  | 130                                        | 114.07263                      |
| 7  | 4-ethylphenol              | 123079   | 14.12                | H, misc.                       | $C_\beta$        | 122                                    | 107.04914                  | 130                                        | 114.07263                      |
| 8  | 4-ethylguaiacol            | 2785899  | 14.73                | G, misc.                       | $C_\beta$        | 152                                    | 137.05971                  | 161                                        | 145.08654                      |
| 9  | 4-vinylguaiacol            | 7786610  | 16.20                | G, vinyl                       | $C_\beta$        | 150                                    | 150.06753                  | 159                                        | 159.09754                      |
| 10 | 4-vinylphenol              | 2628173  | 16.36                | H, vinyl                       | $C_\beta$        | 120                                    | 120.05697                  | 128                                        | 128.08381                      |
| 11 | eugenol                    | 97530    | 16.80                | G, misc.                       | $C_\gamma$       | 164                                    | 164.08318                  | 174                                        | 174.11673                      |
| 12 | 4-propylguaiacol           | 2785877  | 16.90                | G, misc.                       | $C_\gamma$       | 166                                    | 137.05971                  | 175                                        | 145.08654                      |
| 13 | syringol                   | 91101    | 17.52                | S, unsub.                      | 0                | 154                                    | 154.06245                  | 162                                        | 162.08928                      |
| 14 | cis-isoeugenol             | 97541    | 18.18                | G, misc.                       | $C_\gamma$       | 164                                    | 164.08318                  | 174                                        | 174.11673                      |
| 15 | 4-propenylphenol           | 539128   | 19.14                | H, misc.                       | $C_\gamma$       | 134                                    | 133.06479                  | 143                                        | 142.09498                      |
| 16 | trans-isoeugenol           | 97541    | 19.49                | G, misc.                       | $C_\gamma$       | 164                                    | 164.08318                  | 174                                        | 174.11673                      |
| 17 | 4-methylsyringol           | 6638057  | 19.74                | S, methyl                      | $C_\alpha$       | 168                                    | 168.07810                  | 177                                        | 177.10829                      |
| 18 | vanillin                   | 121335   | 19.83                | G, $C_\alpha$ -O               | $C_\alpha$       | 152                                    | 151.03897                  | 160                                        | 159.06581                      |
| 19 | 4-propynguaiacol           | -        | 20.23                | G, misc.                       | $C_\gamma$       | 162                                    | 162.06753                  | 172                                        | 172.10108                      |
| 20 | 4-alleneguaiacol           | -        | 20.47                | G, misc.                       | $C_\gamma$       | 162                                    | 162.06753                  | 172                                        | 172.10108                      |
| 21 | homovanillin               | 5603242  | 21.25                | G, $C_\beta$ -O                | $C_\beta$        | 166                                    | 137.05971                  | 175                                        | 145.08654                      |
| 22 | 4-ethylsyringol            | 14059928 | 21.46                | S, misc.                       | $C_\beta$        | 182                                    | 167.07022                  | 192                                        | 176.10046                      |
| 23 | vanillic acid methyl ester | 3943746  | 21.72                | G, $C_\alpha$ -O               | $C_\alpha$       | 182                                    | 182.05736                  | 191                                        | 191.08766                      |
| 24 | acetovanillone             | 498022   | 21.73                | G, $C_\alpha$ -O               | $C_\beta$        | 166                                    | 151.03897                  | 175                                        | 159.06581                      |
| 25 | 4-hydroxybenzaldehyde      | 123080   | 22.52                | H, $C_\alpha$ -O               | $C_\alpha$       | 122                                    | 121.02848                  | 129                                        | 128.05189                      |
| 26 | 4-vinylsyringol            | 28343228 | 22.80                | S, vinyl                       | $C_\beta$        | 180                                    | 180.07810                  | 190                                        | 190.11164                      |
| 27 | guaiacylacetone            | 2503460  | 22.92                | G, $C_\beta$ -O                | $C_\gamma$       | 180                                    | 137.05971                  | 190                                        | 145.08654                      |
| 28 | 4-allylsyringol            | 6627889  | 23.22                | S, misc.                       | $C_\gamma$       | 194                                    | 194.09373                  | 205                                        | 205.13065                      |
| 29 | propiovanillone            | 1835149  | 23.67                | S, $C_\alpha$ -O               | $C_\gamma$       | 180                                    | 151.03897                  | 190                                        | 159.06581                      |
| 30 | guaiacyl vinyl ketone      | -        | 23.94                | G, $C_\alpha$ -O               | $C_\gamma$       | 178                                    | 151.03897                  | 188                                        | 159.06581                      |
| 31 | guaiacyl diketone          | 2034608  | 24.14                | G, $C_\alpha$ -O, $C_\beta$ -O | $C_\gamma$       | 194                                    | 151.03897                  | 204                                        | 159.06581                      |
| 32 | cis-4-propenylsyringol     | 26624135 | 24.36                | S, misc.                       | $C_\gamma$       | 194                                    | 194.09373                  | 205                                        | 205.13065                      |
| 33 | 4-propynesyringol          | -        | 25.03                | S, misc.                       | $C_\gamma$       | 192                                    | 192.07810                  | 203                                        | 203.11500                      |
| 34 | 4-allenesyringol           | -        | 25.24                | S, misc.                       | $C_\gamma$       | 192                                    | 192.07810                  | 203                                        | 203.11500                      |
| 35 | trans-4-propenylsyringol   | 26624135 | 25.71                | S, misc.                       | $C_\gamma$       | 194                                    | 194.09373                  | 205                                        | 205.13065                      |
| 36 | dihydroconiferyl alcohol   | 2305137  | 25.72                | S, $C_\gamma$ -O               | $C_\gamma$       | 182                                    | 137.05971                  | 192                                        | 145.08654                      |
| 37 | syringaldehyde             | 134963   | 26.15                | S, $C_\alpha$ -O               | $C_\alpha$       | 182                                    | 182.05736                  | 191                                        | 191.08755                      |
| 38 | cis-coniferyl alcohol      | 458355   | 26.30                | G, $C_\gamma$ -O               | $C_\gamma$       | 180                                    | 137.05971                  | 190                                        | 145.08654                      |
| 39 | cis-coumaryl alcohol       | 3690059  | 26.50                | H, $C_\gamma$ -O               | $C_\gamma$       | 150                                    | 107.04914                  | 159                                        | 114.07263                      |
| 40 | homosyringaldehyde         | -        | 27.13                | S, $C_\beta$ -O                | $C_\beta$        | 196                                    | 167.07027                  | 206                                        | 176.10046                      |
| 41 | acetosyringone             | 2478388  | 27.57                | S, $C_\alpha$ -O               | $C_\beta$        | 196                                    | 181.04954                  | 206                                        | 190.07973                      |
| 42 | syringic acid methyl ester | 884355   | 27.58                | S, $C_\alpha$ -O               | $C_\alpha$       | 212                                    | 212.06793                  | 222                                        | 222.10147                      |
| 43 | trans-coumaryl alcohol     | 3690059  | 27.58                | H, $C_\gamma$ -O               | $C_\gamma$       | 150                                    | 107.04914                  | 159                                        | 114.07263                      |
| 44 | trans-coniferyl alcohol    | 458355   | 28.04                | G, $C_\gamma$ -O               | $C_\gamma$       | 180                                    | 137.05971                  | 190                                        | 145.08654                      |
| 45 | trans-coniferaldehyde      | 458366   | 28.37                | G, $C_\gamma$ -O               | $C_\gamma$       | 178                                    | 147.04406                  | 188                                        | 156.07425                      |
| 46 | syringylacetone            | 19037582 | 28.47                | S, $C_\beta$ -O                | $C_\gamma$       | 210                                    | 167.07027                  | 221                                        | 176.10046                      |
| 47 | propiosyringone            | 5650431  | 29.16                | S, $C_\alpha$ -O               | $C_\gamma$       | 210                                    | 181.04954                  | 221                                        | 190.07973                      |
| 48 | syringyl diketone          | 6925651  | 29.25                | S, $C_\alpha$ -O, $C_\beta$ -O | $C_\gamma$       | 224                                    | 181.04954                  | 235                                        | 190.07973                      |
| 49 | syringyl vinyl ketone      | -        | 29.43                | S, $C_\alpha$ -O               | $C_\gamma$       | 208                                    | 181.04954                  | 219                                        | 190.07973                      |
| 50 | dihydrosinapyl alcohol     | 20736258 | 31.01                | G, $C_\gamma$ -O               | $C_\gamma$       | 212                                    | 168.07841                  | 223                                        | 177.10829                      |
| 51 | cis-sinapyl alcohol        | 537337   | 31.48                | S, $C_\gamma$ -O               | $C_\gamma$       | 210                                    | 167.07027                  | 221                                        | 176.10046                      |
| 52 | trans-sinapyl alcohol      | 537337   | 33.23                | S, $C_\gamma$ -O               | $C_\gamma$       | 210                                    | 167.07027                  | 221                                        | 176.10046                      |
| 53 | trans-sinapaldehyde        | 4206580  | 33.40                | S, $C_\gamma$ -O               | $C_\gamma$       | 208                                    | 208.07301                  | 219                                        | 219.10994                      |

**Table S2.** Annotation of catechol and methoxycatechol pyrolysis products detected using <sup>13</sup>C-IS pyrolysis-GC-MS.

| Retention time (min) | Quan ion <sup>12</sup> C [m/z] | Annotation                 |
|----------------------|--------------------------------|----------------------------|
| 16.04                | 140.04735                      | methoxycatechol            |
| 16.62                | 124.05243                      | 4-methylcatechol           |
| 17.45                | 110.03623                      | catechol                   |
| 18.12                | 140.04735                      | methoxycatechol derivative |
| 18.40                | 124.05243                      | catechol derivative        |
| 19.38                | 124.05243                      | catechol derivative        |
| 21.08                | 140.04735                      | methoxycatechol derivative |
| 21.67                | 140.04735                      | methoxycatechol derivative |

**Table S3. Composition of wood samples.** The table shows the content of carbohydrates, lignin, and protein in sound and brown-rot decayed (BR) wood as percentage of the total dry mass, as well as the total accounted fraction of the dry matter. AIL, acid insoluble lignin; ASL, acid soluble lignin. Numbers are shown as average  $\pm$  standard deviation (n=2 for protein, n=3 for others).

| Wood             | Carbohydrates | Protein         | AIL <sup>a</sup> | ASL           | Lignin (py-GC-MS) | Fraction accounted <sup>b</sup> |
|------------------|---------------|-----------------|------------------|---------------|-------------------|---------------------------------|
| <b>Spruce</b>    | 64 $\pm$ 2    | n.d.            | 27.5 $\pm$ 0.9   | 0.8 $\pm$ 0.1 | 31 $\pm$ 2        | 92 $\pm$ 2                      |
| <b>BR Spruce</b> | 5 $\pm$ 1     | 1.91 $\pm$ 0.08 | 80.8 $\pm$ 0.7   | 2.2 $\pm$ 0.1 | 64 $\pm$ 4        | 90 $\pm$ 1                      |
| <b>Birch</b>     | 64 $\pm$ 4    | n.d.            | 22.1 $\pm$ 0.1   | 4.7 $\pm$ 0.5 | 30 $\pm$ 2        | 91 $\pm$ 4                      |
| <b>BR Birch</b>  | 19 $\pm$ 1    | 2.88 $\pm$ 0.04 | 65.1 $\pm$ 0.3   | 5.3 $\pm$ 0.2 | 61 $\pm$ 1        | 91 $\pm$ 1                      |

<sup>a</sup>Corrected for protein content in the AIL fraction (0.8% in BR spruce and 1.6% in BR birch)

n.d.: not detected/below limit of detection.

<sup>b</sup> sum of carbohydrates, protein, AIL, ASL

**Table S4. Constituent anhydro-monosaccharide composition.** Calculated content of monosaccharides in sound and brown-rot decayed wood as percentage of the total dry matter. Numbers are shown as average  $\pm$  standard deviation (n=3).

| <b>Wood</b>      | <b>Arabinose</b> | <b>Galactose</b> | <b>Glucose</b> | <b>Xylose</b> | <b>Mannose</b>  |
|------------------|------------------|------------------|----------------|---------------|-----------------|
| <b>Spruce</b>    | 1.04 $\pm$ 0.07  | 1.48 $\pm$ 0.06  | 43 $\pm$ 2     | 6.1 $\pm$ 0.3 | 12.9 $\pm$ 0.3  |
| <b>BR Spruce</b> | 0.18 $\pm$ 0.08  | 0.29 $\pm$ 0.09  | 2.0 $\pm$ 0.5  | 1.9 $\pm$ 0.3 | 0.96 $\pm$ 0.5  |
| <b>Birch</b>     | 0.51 $\pm$ 0.03  | 0.80 $\pm$ 0.01  | 39 $\pm$ 2     | 23 $\pm$ 2    | 1.79 $\pm$ 0.05 |
| <b>BR Birch</b>  | 0.11 $\pm$ 0.04  | 0.22 $\pm$ 0.04  | 8.2 $\pm$ 0.7  | 7.2 $\pm$ 0.3 | 3.0 $\pm$ 0.6   |

**Table S5. Hydroxyl content (mmol/g) of lignin isolated from brown-rot decayed wood as determined by <sup>31</sup>P NMR.** Aliphatic: Aliphatic OH groups, Benzoic acid: COOH groups in aromatic rings. S+G cond.: Condensed syringyl (S) + guaiacyl (G) units. G: Non-condensed guaiacyl units. H+MC+C: hydroxyl groups from p-hydroxyphenyl (H), methoxy-catechols (MC), catechols (C). Total phenolic: Sum of all phenolic hydroxyl groups (condensed + non-condensed)

|               |           | <b>Aliphatic</b> | <b>Benzoic acid</b> | <b>S+G cond.</b> | <b>G</b> | <b>H+MC+C</b> | <b>Total phenolic</b> |
|---------------|-----------|------------------|---------------------|------------------|----------|---------------|-----------------------|
| <b>Spruce</b> | Sound     | 2.98             | 0.17                | 0.47             | 0.42     | 0.08          | 0.96                  |
|               | Brown-rot | 3.28             | 0.33                | 0.89             | 1.14     | 0.20          | 2.23                  |
| <b>Birch</b>  | Sound     | 4.32             | 0.18                | 0.65             | 0.31     | 0.09          | 1.05                  |
|               | Brown-rot | 3.47             | 0.28                | 0.93             | 0.65     | 0.15          | 1.83                  |



**Table S6. Molecular weight distribution of lignin isolated from brown-rot decayed spruce and birch, and acetone/H<sub>2</sub>O extracts of these, as determined by alkaline SEC.** Lignin isolated from sound wood could not be analyzed by SEC due to incomplete solubility.  $M_w$ : weight-average molecular weight.  $M_n$ : number-average molecular weight.  $\bar{D}$ : dispersity/polydispersity index, which is the ratio of  $M_w$  to  $M_n$ .

|               |                          | $M_w$ (g/mol) | $M_n$ (g/mol) | $\bar{D}$ ( $M_w/M_n$ ) |
|---------------|--------------------------|---------------|---------------|-------------------------|
| <b>Spruce</b> | Brown-rot                | 6450          | 1690          | 3.8                     |
|               | Acetone/H <sub>2</sub> O | 2100          | 860           | 2.4                     |
| <b>Birch</b>  | Brown-rot                | 4990          | 1370          | 3.6                     |
|               | Acetone/H <sub>2</sub> O | 2010          | 820           | 2.5                     |

**Table S7.** Structural characterization of acetone/H<sub>2</sub>O extracts of brown-rot decayed spruce and birch by semi-quantitative HSQC NMR (400 MHz). G<sub>ox</sub>/S<sub>ox</sub>: guaiacyl/syringyl units oxidized on the C $\alpha$ -carbon. G<sub>cond</sub>: guaiacyl units involved in condensed linkages. MC: methoxycatechyl units. MC<sub>ox</sub>: methoxycatechyl units oxidized on the C $\alpha$ -carbon, “ar” refers to aromatic rings.

| Subunits (%)                    | BR spruce acetone/H <sub>2</sub> O | BR birch acetone/H <sub>2</sub> O |
|---------------------------------|------------------------------------|-----------------------------------|
| G                               | 69.4                               | 17.8                              |
| G <sub>cond</sub>               | 17.0                               | 0.0                               |
| G <sub>ox</sub>                 | 13.5                               | 0.0                               |
| S                               | 0.0                                | 59.4                              |
| S <sub>ox</sub>                 | 0.0                                | 10.1                              |
| MC                              | 0.0                                | 12.7                              |
| MC <sub>ox</sub>                | 0.0                                | 0.0                               |
| S/G                             | -                                  | 3.9                               |
| Interunit linkages (per 100 ar) |                                    |                                   |
| $\beta$ -O-4 aryl ether         | 25.5                               | 49.6                              |
| $\beta$ -5 phenylcoumaran       | 10.9                               | 0.6                               |
| $\beta$ - $\beta$ resinol       | 1.5                                | 5.8                               |
| End units (per 100 ar)          |                                    |                                   |
| Cinnamaldehyde                  | 1.4                                | 2.3                               |
| Benzaldehyde                    | 5.9                                | 1.7                               |
| Ring substituents (per 100 ar)  |                                    |                                   |
| Methoxy <sup>1a</sup>           | 90.8 (88.5) <sup>b</sup>           | 136.4                             |

<sup>a</sup>corrected for the overlapping residual EtOH solvent peak; <sup>b</sup>the value in parentheses is based on the total aromatic region to account for C2, C5, C6, G5, G6 overlap. “ar” refers to the aromatic rings.
